# Supplementary material for: Podocyte-specific Crb2 knockout mice develop focal segmental glomerulosclerosis
Source: PubMed Central journal article supplement (PMC8519956; doi:10.1038/s41598-021-00159-z), 2021-10-15
Supplement: 41598_2021_159_MOESM3_ESM.pdf [file 41598_2021_159_MOESM3_ESM.pdf]

## Supplementary Information

### Podocyte-specific Crb2 knockout mice develop focal segmental glomerulosclerosis

Akiko Tanoue, MD<sup>1,+</sup>, Kan Katayama, MD<sup>1,2,+,\*</sup>, Yugo Ito, MD<sup>2,3</sup>, Kensuke Joh, MD<sup>4</sup>, Masaaki Toda, PhD<sup>5</sup>, Taro Yasuma, MD<sup>5</sup>, Corina N D'Alessandro-Gabazza, MD<sup>5</sup>, Hiroshi Kawachi, MD<sup>6</sup>, Kunimasa Yan, MD<sup>3</sup>, Masaaki Ito, MD<sup>1</sup>, Esteban C Gabazza, MD<sup>5</sup>, Karl Tryggvason, MD<sup>2,7</sup>, Kaoru Dohi, MD<sup>1</sup>

### Supplementary Methods

#### *RNA-sequencing*

Total RNA was extracted from the kidneys of Crb2<sup>fl/fl</sup> mice or Crb2<sup>fl/fl</sup>pod-Cre<sup>Tg/+</sup> mice at six months of age (each  $n = 5$ ) using a TRIzol Plus RNA purification kit (ThermoFisher Scientific).

An Ion PI Chip Kit v3 (ThermoFisher Scientific) was used to perform sequencing with an Ion Proton Sequencer. The log<sub>2</sub> ratio was calculated from fragments per kilobase of exon per million reads mapped (FPKM) to compare the two groups. Comparisons between two mouse groups were performed using Student's *t*-test. *P* values of <0.05 were considered significant. *Q* value was calculated by Benjamini & Hochberg method to control the false discovery rate.

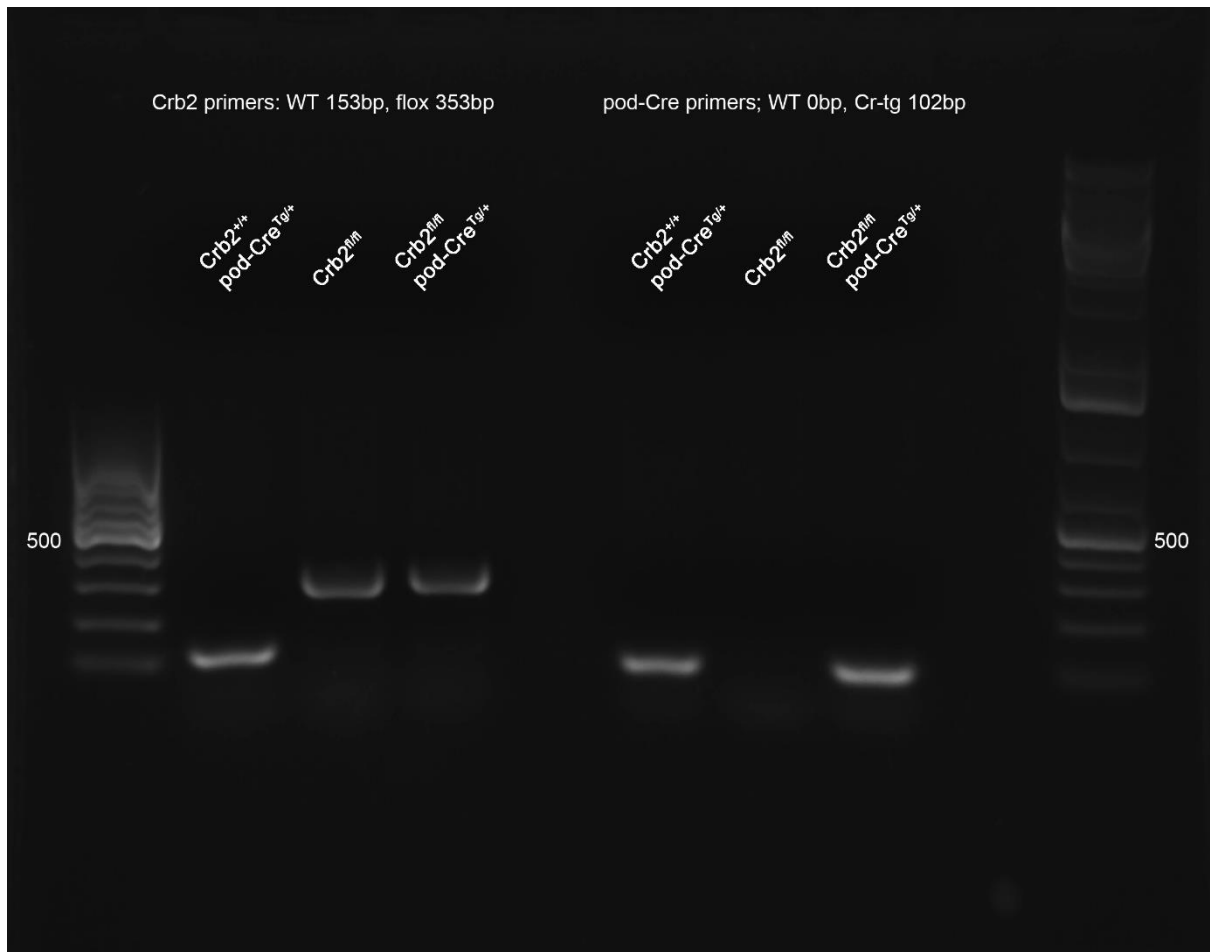

**Supplementary Figure S1.** Full length gels.

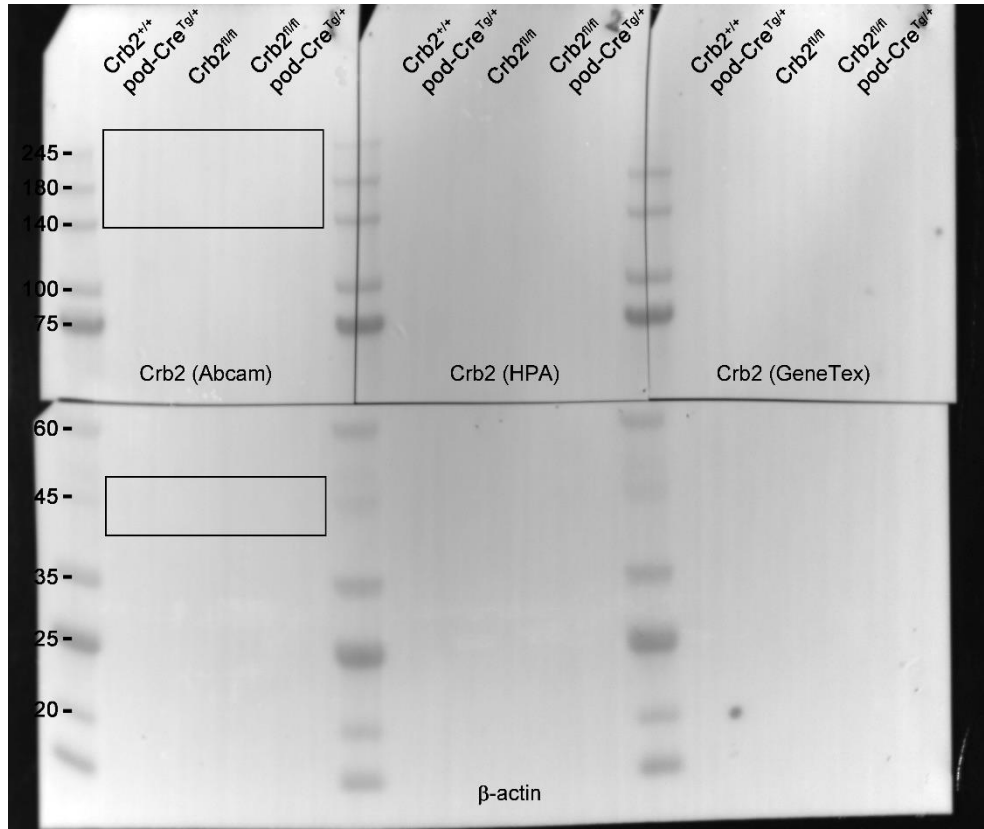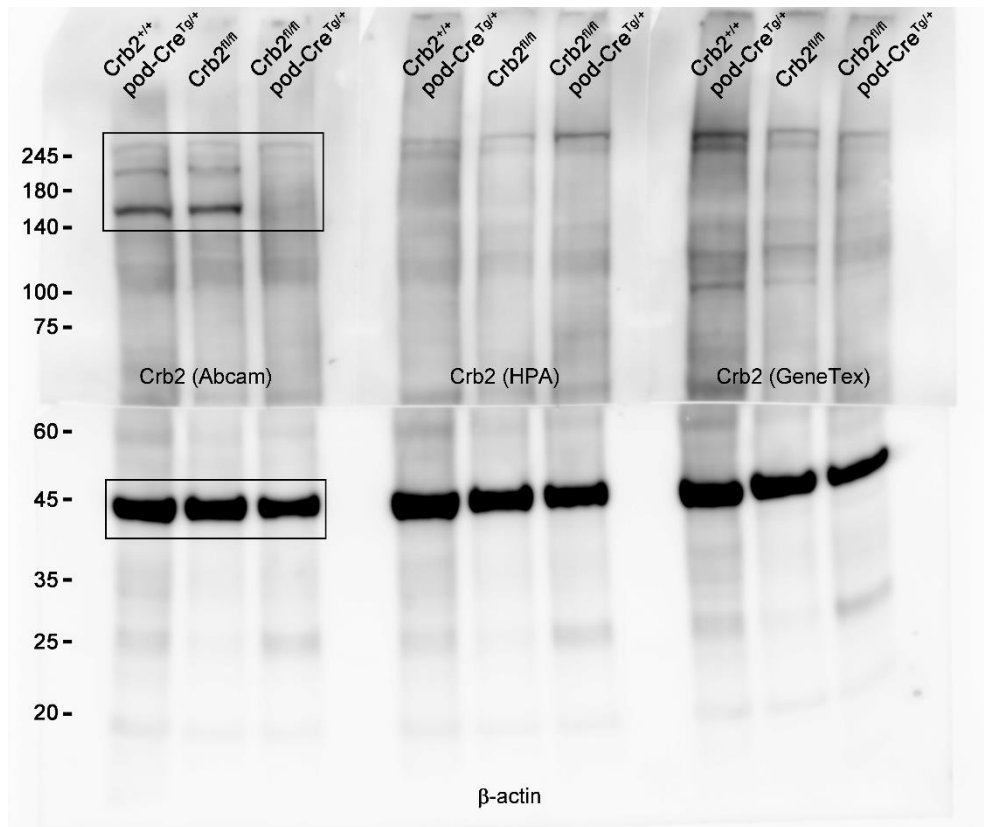

Supplementary Figure S2. Full length blots.

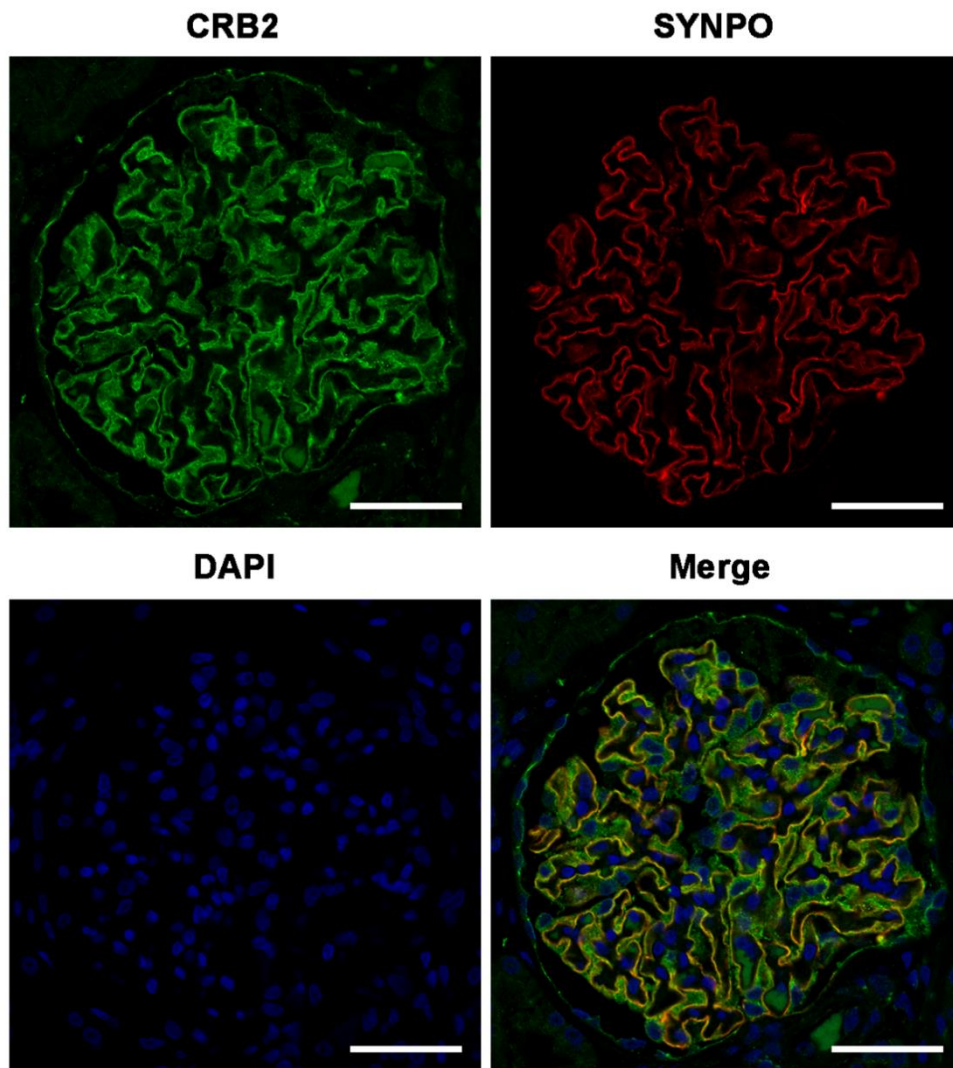

**Supplementary Figure S3.** Dual staining with CRB2 and SYNPO, a podocyte marker, in normal human paraffin kidney section showed colocalization of CRB2 and SYNPO. Scale bars 50  $\mu\text{m}$ .

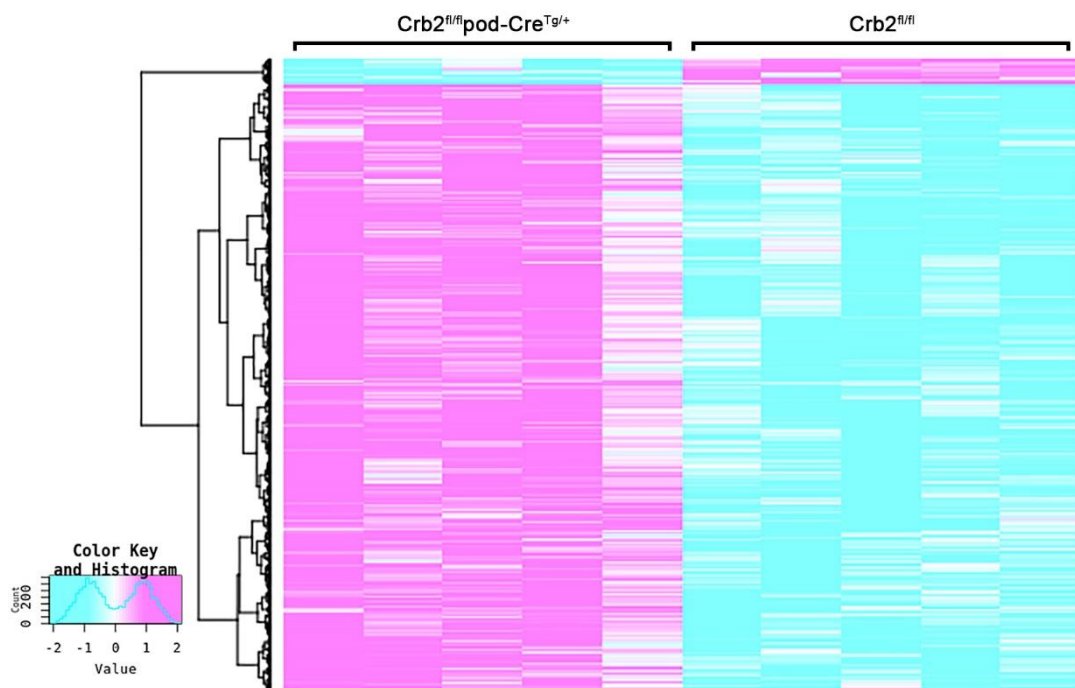

**Supplementary Figure S4.** The heat map from RNA-seq data after Benjamini & Hochberg method showed 666 differentially expressed genes between  $Crb2^{fl/fl}pod-Cre^{Tg/+}$  mice and  $Crb2^{fl/fl}$  mice.

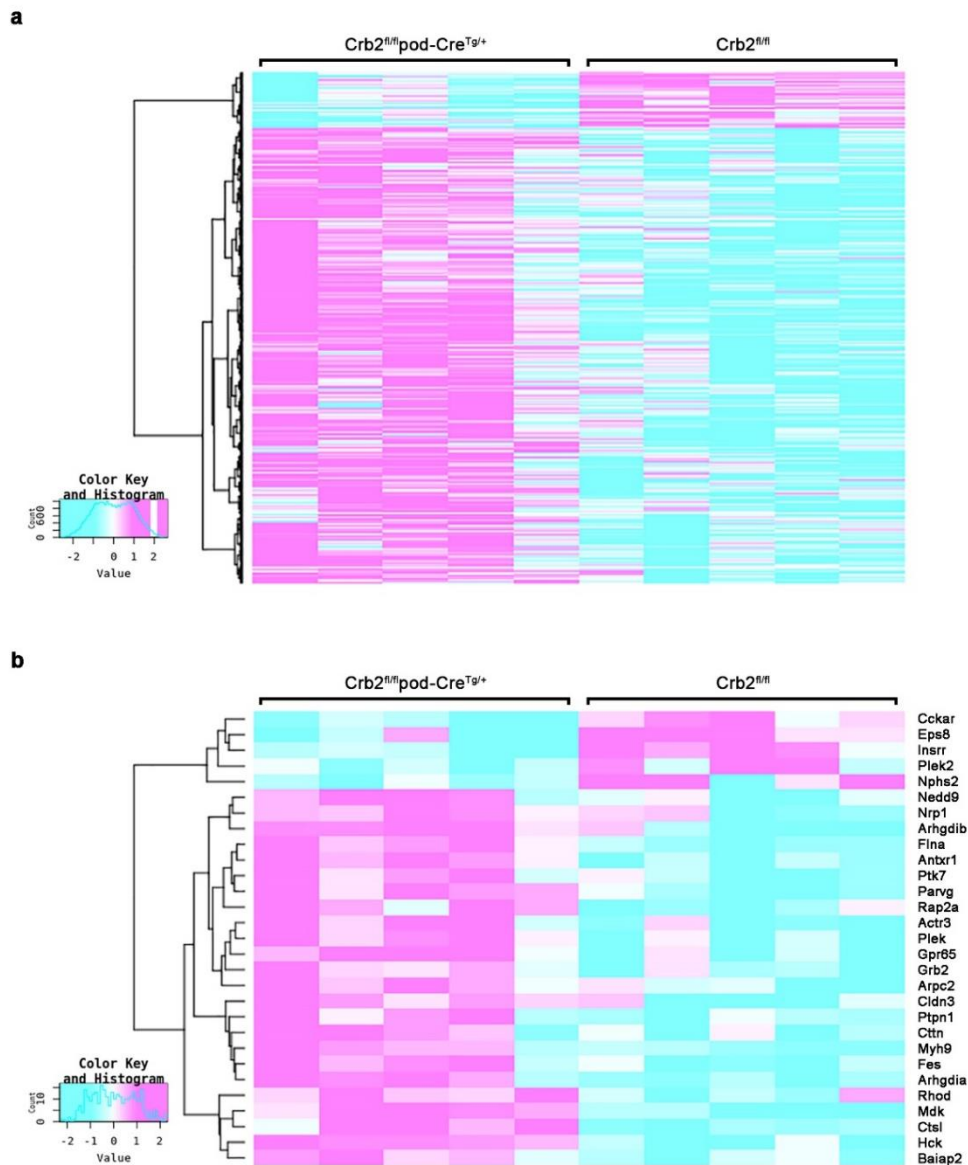

**Supplementary Figure S5. RNA-seq analysis of the total kidney RNA extracts between  $Crb2^{fl/fl}pod-Cre^{Tg/+}$  mice and  $Crb2^{fl/fl}$  mice at six months of age. (a) The heat map from RNA-seq data before Benjamini & Hochberg method showed 3,174 differentially expressed genes between  $Crb2^{fl/fl}pod-Cre^{Tg/+}$  mice and  $Crb2^{fl/fl}$  mice. (b) The heat map from RNA-seq data showed 29 differentially expressed genes that were associated with actin cytoskeleton reorganization (GO: 0031532).**

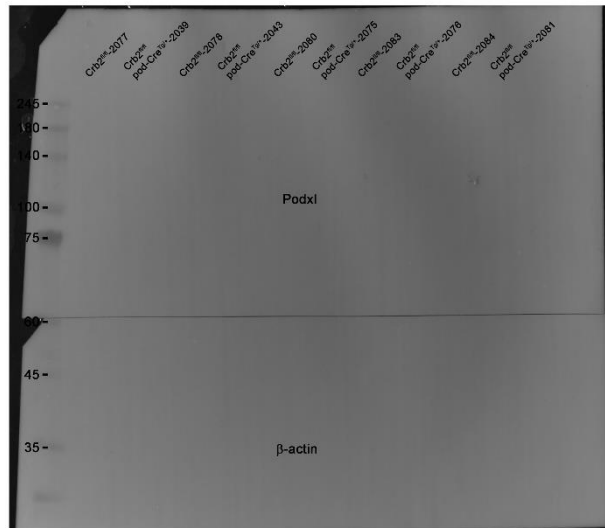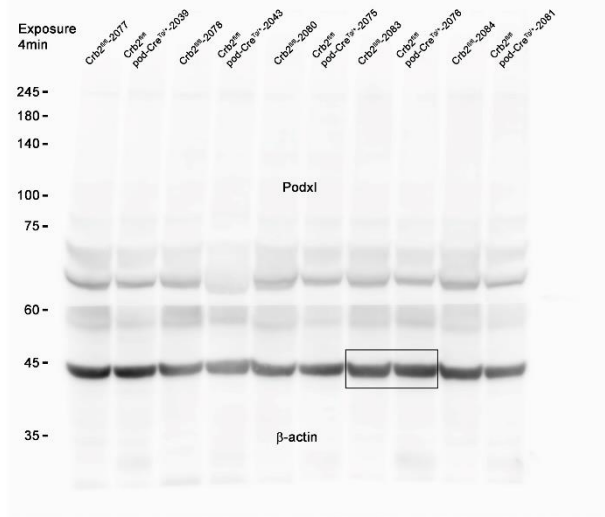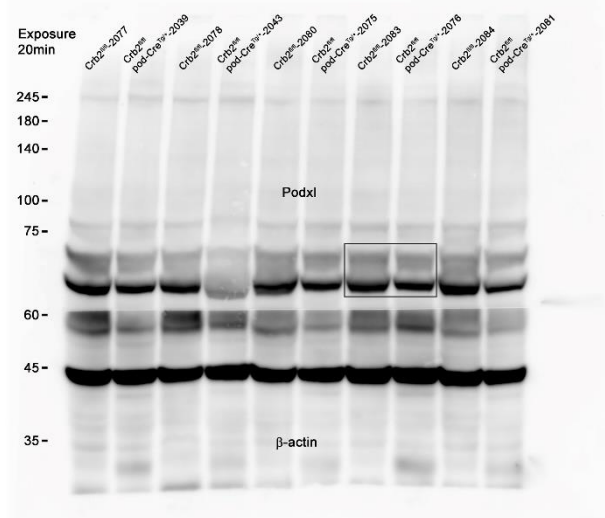

Supplementary Figure S6. Full length blots.

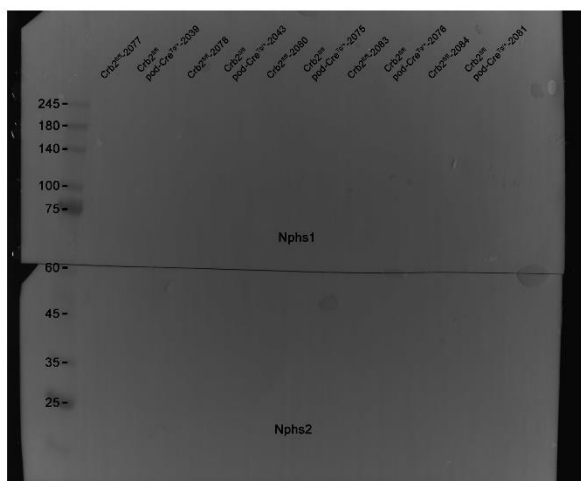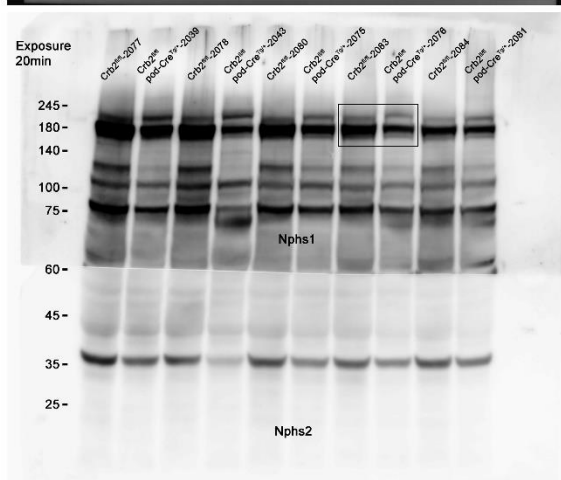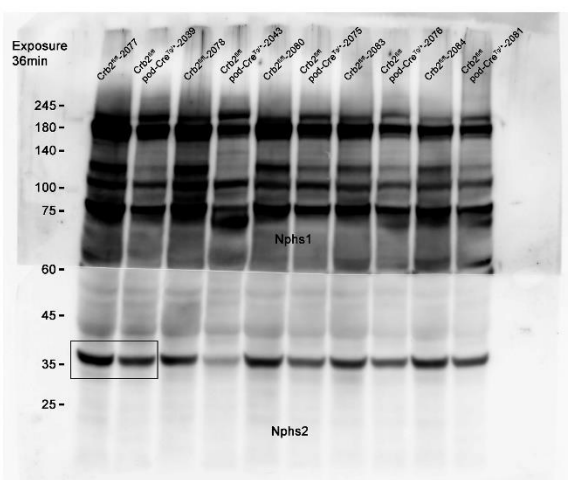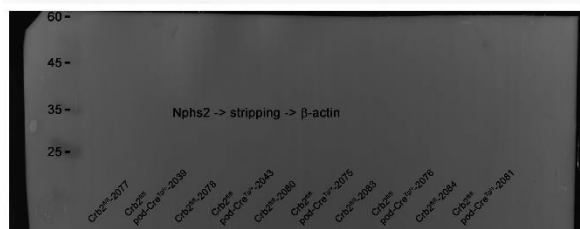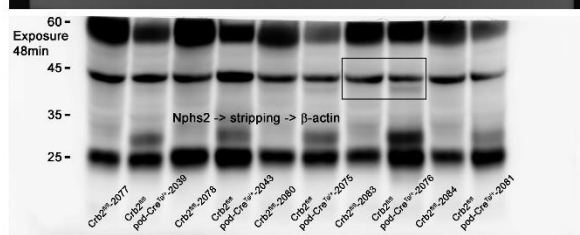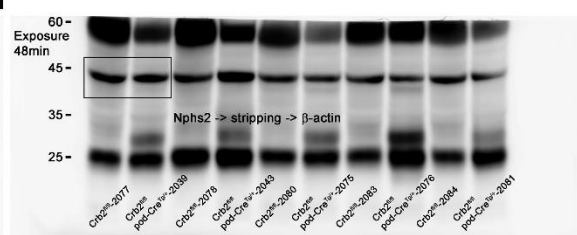

Supplementary Figure S7. Full length blots.



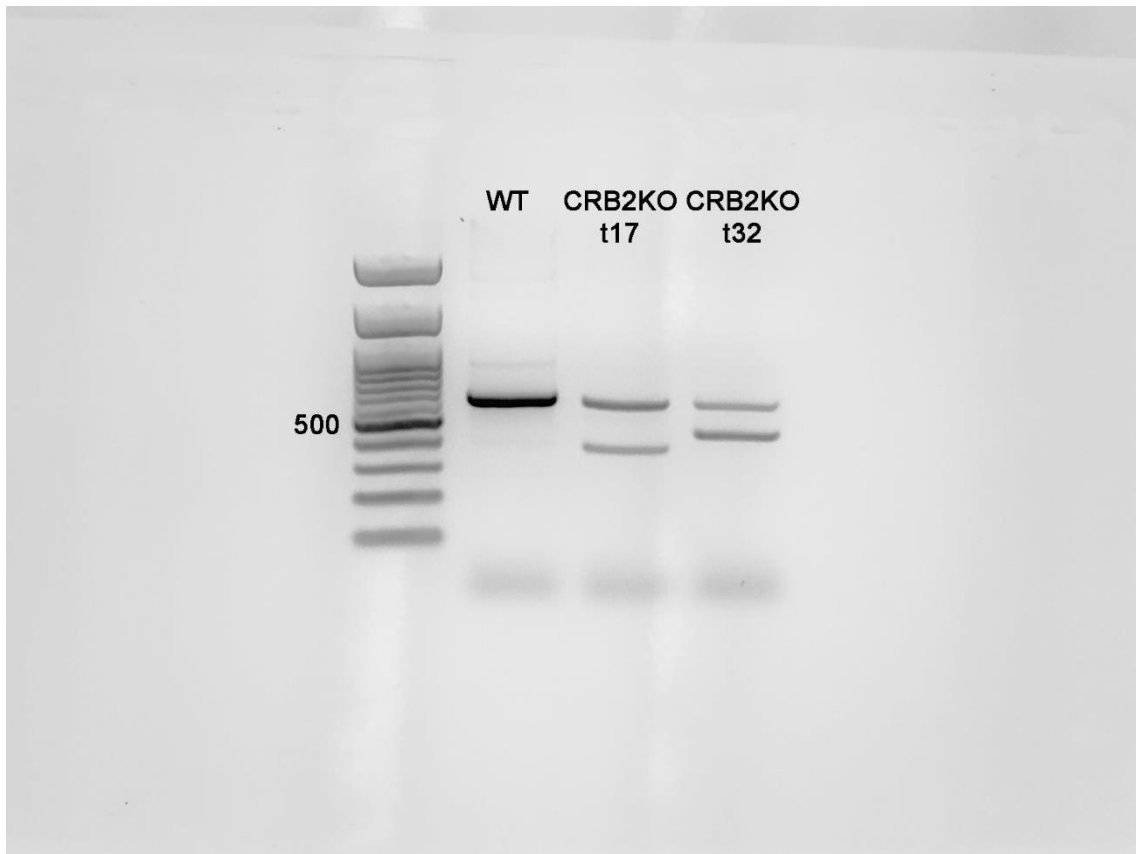

**Supplementary Figure S8.** Full length gels.

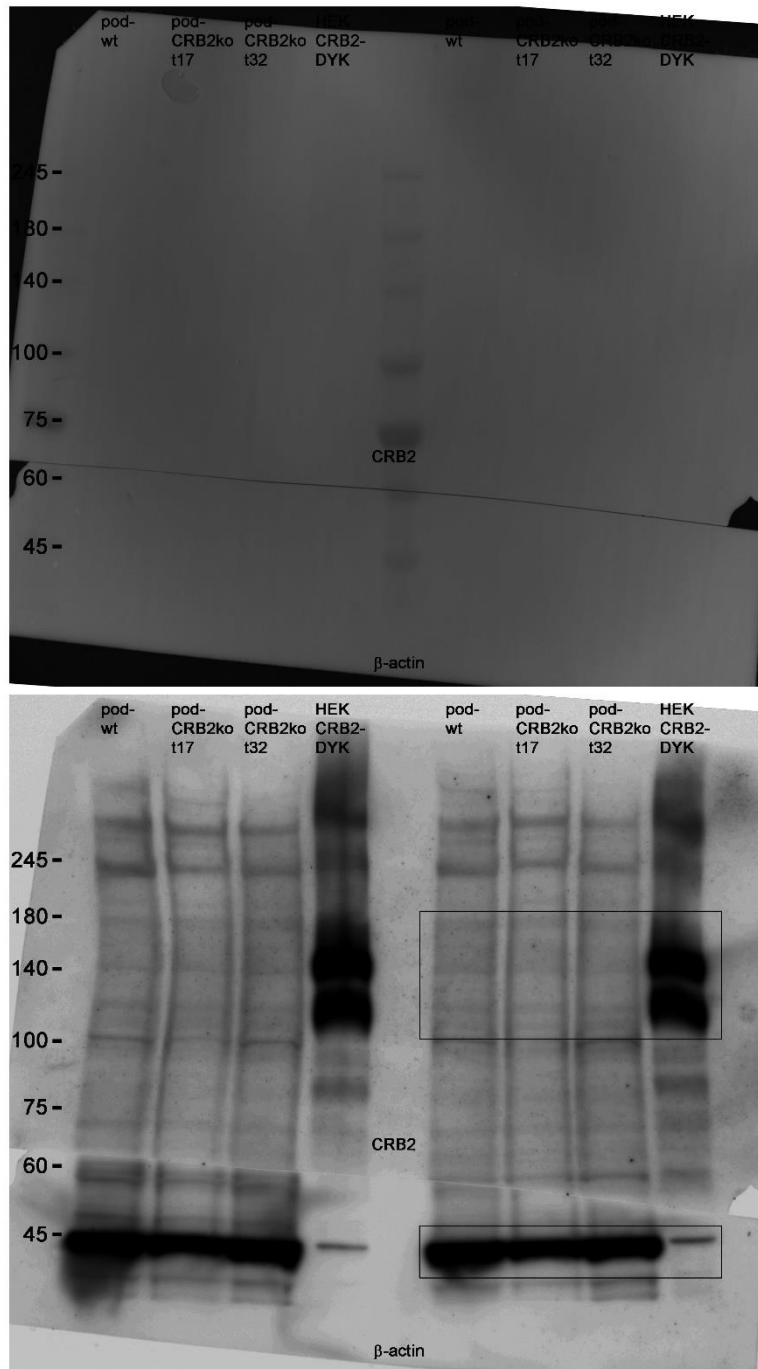

**Supplementary Figure S9. Full length blots.**

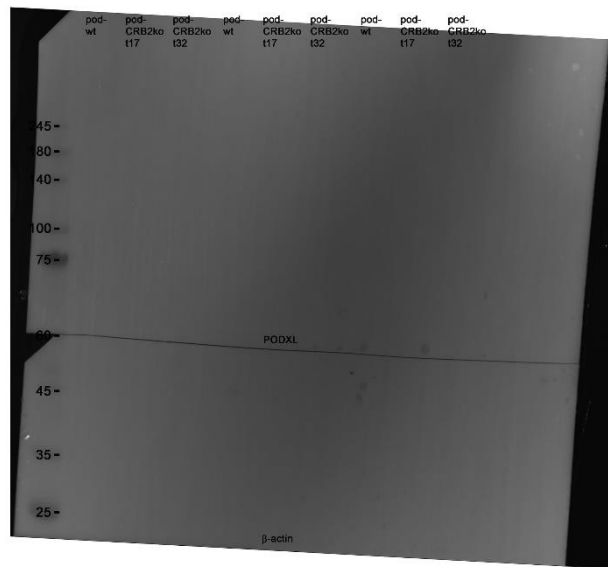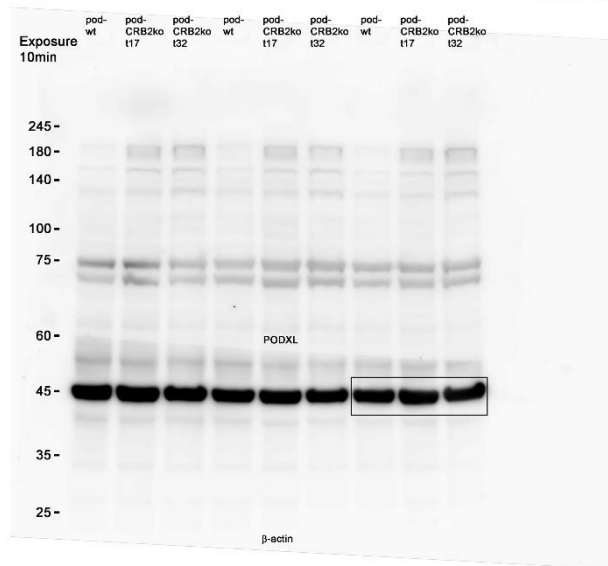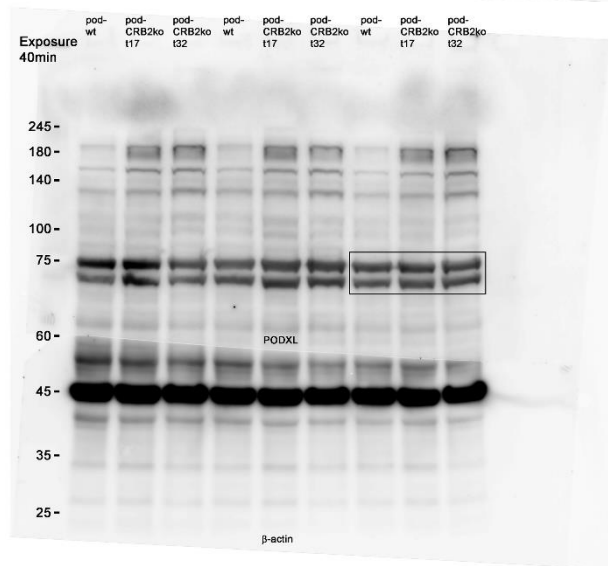

Supplementary Figure S10. Full length blots.

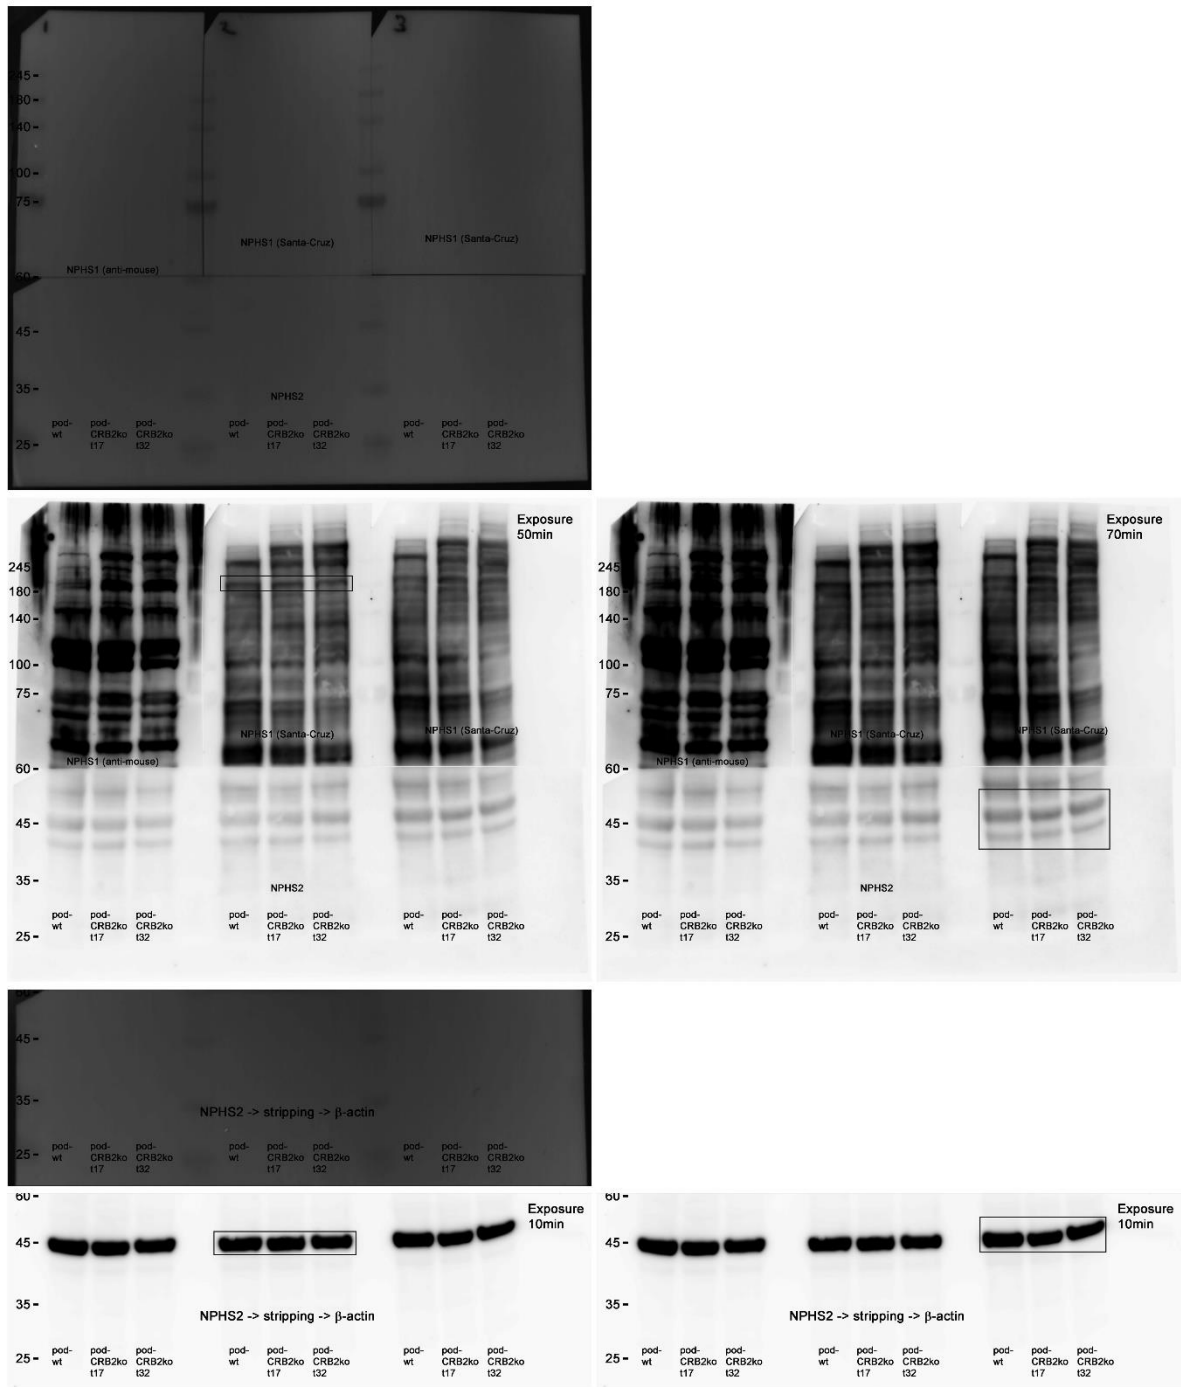

Supplementary Figure S11. Full length blots.

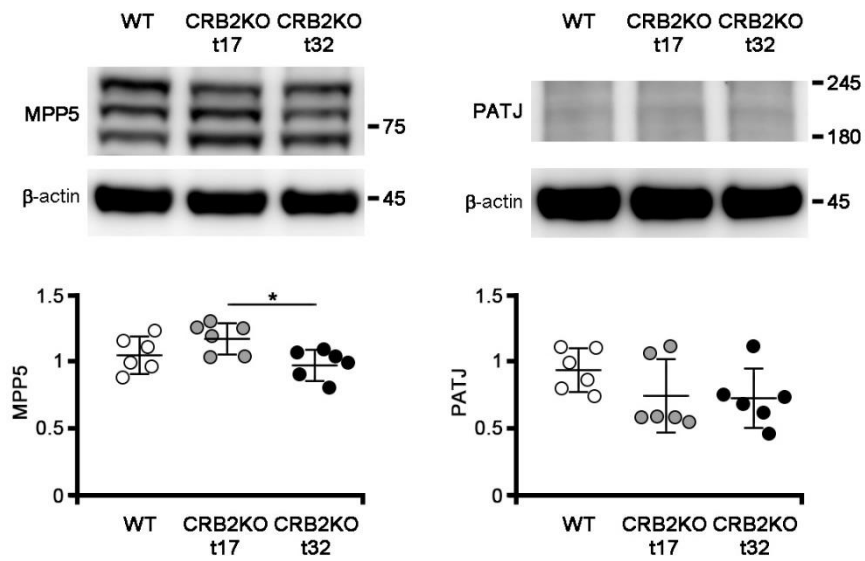

**Supplementary Figure S12. Western blot analysis.** The expressions of MPP5 (PALS1) and PATJ were comparable between wild-type and CRB2 knockout t17 or t32 clone. Data are presented as mean  $\pm$  SD. Statistical analysis by one-way analysis of variance, followed by Scheffe's multiple comparison test;  $n = 6$  in each group. \* $P < 0.05$ . CRB2KO, CRB2 knockout; WT, wild-type.

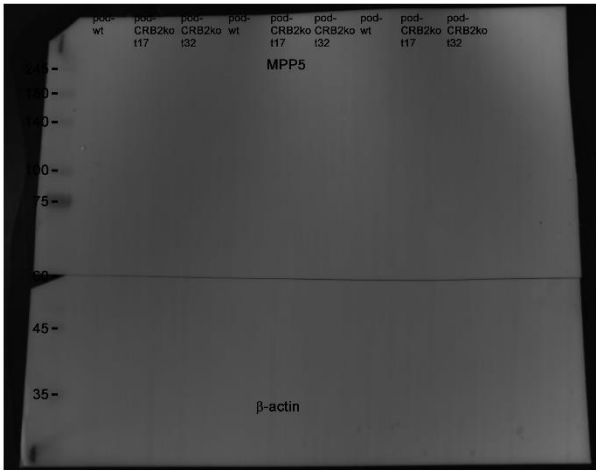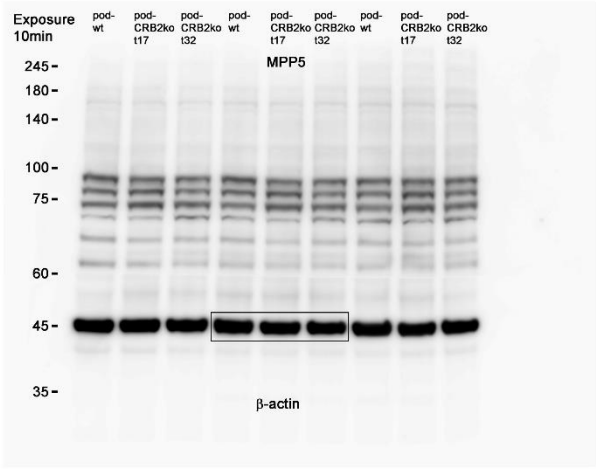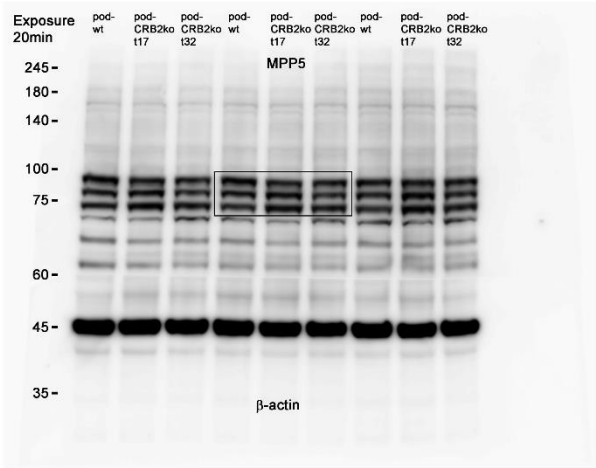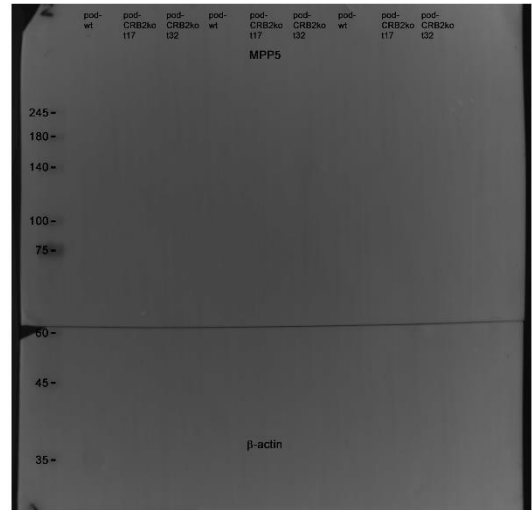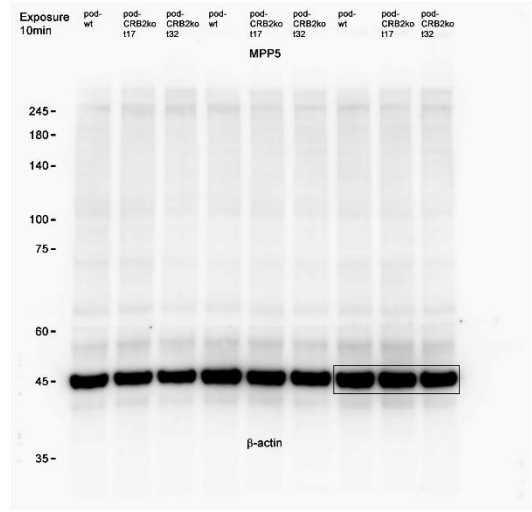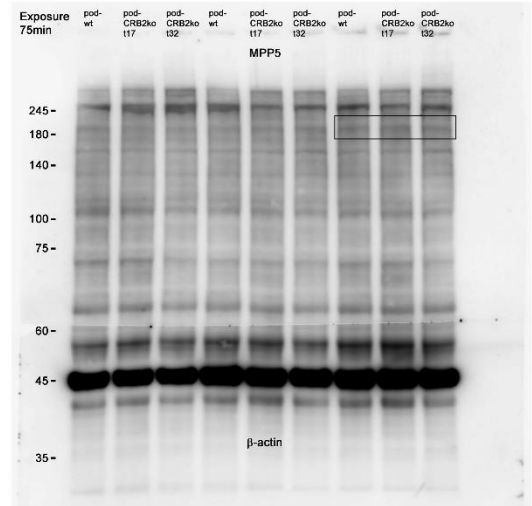

Supplementary Figure S13. Full length blots.

**Supplementary Table S1.** The FPKM of 23,913 genes ( $\text{Crb2}^{\text{fl/fl}}\text{pod-Cre}^{\text{Tg/+}}$  mice vs.  $\text{Crb2}^{\text{fl/fl}}$  mice).

**Supplementary Table S2.** The log 2 ratio was calculated from the 13,880 genes. There were 3174 and 666 significant genes before and after correction with Benjamini & Hochberg method. Among 666 significant genes, 477 genes were upregulated >2-fold, and 16 genes were downregulated >2-fold in  $\text{Crb2}^{\text{fl/fl}}\text{pod-Cre}^{\text{Tg/+}}$  mice compared to  $\text{Crb2}^{\text{fl/fl}}$  mice. Among 3174 significant genes ( $P < 0.05$ ), 1173 genes were upregulated >2-fold and 91 genes were downregulated >2-fold in  $\text{Crb2}^{\text{fl/fl}}\text{pod-Cre}^{\text{Tg/+}}$  mice compared to  $\text{Crb2}^{\text{fl/fl}}$  mice.

**Supplementary Table S3. List of the top 50 upregulated genes (*Crb2<sup>fl/fl</sup>pod-Cre<sup>Tg/+</sup>* mice vs. *Crb2<sup>fl/fl</sup>* mice).**

| Gene name   | Fold change | P value     |
|-------------|-------------|-------------|
| Gm8989      | 12.46829454 | 0.019298833 |
| Nup62-il4i1 | 10.88126439 | 0.025637238 |
| Rpl30       | 8.810643919 | 0.019165951 |
| Hist2h2aa2  | 8.584899434 | 0.049745248 |
| Gpmb        | 7.024930476 | 2.10896E-06 |
| Lyz1        | 5.562341462 | 4.62815E-06 |
| Lcn2        | 5.414324374 | 0.000152463 |
| C3          | 5.059644997 | 1.35012E-05 |
| Igj         | 4.509676107 | 6.18876E-06 |
| Mmp12       | 4.322855777 | 4.41511E-05 |
| Lyz2        | 4.220226067 | 5.91434E-06 |
| Tmem254c    | 4.120248557 | 0.023221483 |
| C4b         | 3.895213675 | 0.000138062 |
| Irf4        | 3.88440741  | 5.5963E-05  |
| Gm13139     | 3.815498997 | 0.046302063 |
| Socs3       | 3.769922819 | 4.22481E-05 |
| Fgg         | 3.730008662 | 1.15862E-05 |
| Ccl6        | 3.698088051 | 2.42672E-05 |
| Ltbp2       | 3.636151228 | 0.001318297 |
| Clec7a      | 3.512668839 | 1.27358E-05 |
| Wfdc17      | 3.493613442 | 7.85691E-06 |
| Cd52        | 3.390721291 | 9.06779E-06 |
| Fgb         | 3.372863553 | 0.001027696 |
| Serpina3f   | 3.338314847 | 3.19237E-05 |
| Serpina3g   | 3.325789153 | 3.24867E-05 |
| Fbn2        | 3.305146815 | 0.008370783 |
| Ctss        | 3.272568716 | 1.46021E-05 |
| Cd48        | 3.255894489 | 0.001291265 |
| Itgam       | 3.245105157 | 0.003406965 |
| Clec12a     | 3.216620358 | 1.5306E-05  |
| Cd68        | 3.182653941 | 0.000644202 |
| Lcp2        | 3.166086428 | 0.00021437  |



|         |             |             |
|---------|-------------|-------------|
| Fcer1g  | 3.152743139 | 0.000573947 |
| Lilrb4  | 3.115325993 | 9.0503E-05  |
| Slamf7  | 3.051969313 | 0.000193061 |
| Cd22    | 3.042341904 | 0.000228756 |
| Siglec1 | 3.015427564 | 0.000305182 |
| Rac2    | 3.013688736 | 0.000978433 |
| Tyrobp  | 3.008423352 | 0.000112662 |
| Itgax   | 3.003315165 | 4.40734E-05 |
| Sash3   | 2.99235193  | 8.99449E-05 |
| Hpse    | 2.988746018 | 0.002831924 |
| Cd53    | 2.973379266 | 1.28422E-05 |
| Cd79b   | 2.97156853  | 0.010067433 |
| Col8a1  | 2.935325535 | 0.000546585 |
| Aif1    | 2.92249236  | 0.000753079 |
| Ttr     | 2.901980772 | 0.000536631 |
| Kcnn4   | 2.896472537 | 0.000147677 |
| Pstpip1 | 2.882440254 | 0.002910066 |
| Hck     | 2.874011216 | 0.000348022 |

---

**Supplementary Table S4. List of the top 50 downregulated genes (*Crb2<sup>fl/fl</sup>pod-Cre<sup>Tg/+</sup>* mice vs. *Crb2<sup>fl/fl</sup>* mice).**

| Gene name     | Fold change  | P value     |
|---------------|--------------|-------------|
| Gm8989        | -10.42890421 | 0.015210395 |
| Igf2          | -3.063794679 | 0.030509928 |
| Hdc           | -2.94931241  | 0.026868878 |
| 9030619P08Rik | -2.919414982 | 0.022654066 |
| Slc22a7       | -2.830913706 | 0.011120101 |
| Cyp2d12       | -2.64227592  | 0.002192773 |
| Aqp4          | -2.546164357 | 0.000161136 |
| Slc10a2       | -2.497432276 | 6.10137E-08 |
| Dnase1        | -2.228894892 | 0.003900844 |
| Bhmt          | -2.177836854 | 0.017069458 |
| Myh1          | -2.103439592 | 0.025307765 |
| Slc22a26      | -1.912100221 | 0.0002472   |
| Gnmt          | -1.891678683 | 0.00668659  |
| Akr1c14       | -1.877825864 | 0.03115562  |
| Slc22a27      | -1.825775221 | 0.007884798 |
| Mep1b         | -1.800422647 | 0.00209396  |
| Slitrk6       | -1.771260456 | 0.001658349 |
| Hao2          | -1.752540101 | 0.039642322 |
| 4921530L18Rik | -1.695141139 | 0.007050611 |
| Cpb2          | -1.676523042 | 0.008871115 |
| Hsd17b2       | -1.669216308 | 0.00631797  |
| Sec14l3       | -1.642193034 | 0.025894067 |
| 1110032F04Rik | -1.626213396 | 0.006080414 |
| 4932435O22Rik | -1.612135076 | 0.022717182 |
| Gm853         | -1.58312922  | 0.013718506 |
| 6330410L21Rik | -1.525642044 | 0.025284721 |
| C8a           | -1.500393718 | 0.004442203 |
| Egf           | -1.499992406 | 0.046802799 |
| Ell3          | -1.490529679 | 0.001330616 |
| Kap           | -1.488228403 | 0.024840624 |
| Gk2           | -1.472050102 | 0.021314165 |
| Nphs2         | -1.464949514 | 0.047828899 |

|               |              |             |
|---------------|--------------|-------------|
| Tfrc          | -1.458133359 | 0.001945646 |
| Ces2b         | -1.435675268 | 0.025473172 |
| Cyp2c44       | -1.412157704 | 0.016932267 |
| Slc16a4       | -1.40961605  | 0.014485248 |
| C730027H18Rik | -1.37284126  | 0.028764597 |
| Pm20d1        | -1.353774637 | 0.000239712 |
| Fgfbp1        | -1.337002325 | 0.00029839  |
| 6430571L13Rik | -1.335425963 | 0.003887843 |
| Acy1          | -1.334106933 | 0.011753335 |
| D630029K05Rik | -1.283578326 | 0.008164409 |
| Cndp1         | -1.271703347 | 0.009293082 |
| Fam107a       | -1.245175642 | 0.006932568 |
| Gpm6a         | -1.232569392 | 0.003502323 |
| Acsml         | -1.228582575 | 0.02615072  |
| 2310042D19Rik | -1.222477157 | 0.006290261 |
| Akr1d1        | -1.218862439 | 0.007637618 |
| Dmgdh         | -1.215981586 | 0.009296368 |
| Abca13        | -1.212699214 | 0.029659218 |

---

**Supplementary Table S5. KEGG pathways in David functional analysis from 1173 more**

**than two-fold upregulated genes (*Crb2*<sup>fl/fl</sup>*pod-Cre*<sup>Tg/+</sup> mice vs. *Crb2*<sup>fl/fl</sup> mice).**

| Category     | Term                                         | Count | P-Value  | Benjamini |
|--------------|----------------------------------------------|-------|----------|-----------|
| KEGG_PATHWAY | Systemic lupus erythematosus                 | 47    | 9.50E-20 | 2.30E-17  |
| KEGG_PATHWAY | Staphylococcus aureus infection              | 27    | 4.70E-18 | 5.70E-16  |
| KEGG_PATHWAY | Osteoclast differentiation                   | 37    | 2.90E-14 | 2.40E-12  |
| KEGG_PATHWAY | Phagosome                                    | 39    | 2.80E-11 | 1.70E-09  |
| KEGG_PATHWAY | Leishmaniasis                                | 23    | 6.00E-11 | 3.00E-09  |
| KEGG_PATHWAY | Cell adhesion molecules (CAMs)               | 36    | 4.00E-10 | 1.60E-08  |
| KEGG_PATHWAY | Tuberculosis                                 | 36    | 4.20E-09 | 1.50E-07  |
| KEGG_PATHWAY | ECM-receptor interaction                     | 24    | 9.70E-09 | 3.00E-07  |
| KEGG_PATHWAY | Fc gamma R-mediated phagocytosis             | 23    | 2.00E-08 | 5.30E-07  |
| KEGG_PATHWAY | HTLV-I infection                             | 45    | 5.30E-08 | 1.30E-06  |
| KEGG_PATHWAY | Viral carcinogenesis                         | 40    | 6.50E-08 | 1.40E-06  |
| KEGG_PATHWAY | Complement and coagulation cascades          | 21    | 8.00E-08 | 1.60E-06  |
| KEGG_PATHWAY | TNF signaling pathway                        | 25    | 1.70E-07 | 3.00E-06  |
| KEGG_PATHWAY | Amoebiasis                                   | 26    | 1.70E-07 | 3.00E-06  |
| KEGG_PATHWAY | Focal adhesion                               | 36    | 3.00E-07 | 4.90E-06  |
| KEGG_PATHWAY | B cell receptor signaling pathway            | 19    | 5.20E-07 | 8.00E-06  |
| KEGG_PATHWAY | Leukocyte transendothelial migration         | 25    | 7.90E-07 | 1.10E-05  |
| KEGG_PATHWAY | Epstein-Barr virus infection                 | 27    | 9.60E-07 | 1.30E-05  |
| KEGG_PATHWAY | Natural killer cell mediated cytotoxicity    | 23    | 1.30E-06 | 1.70E-05  |
| KEGG_PATHWAY | Transcriptional misregulation in cancer      | 30    | 1.40E-06 | 1.70E-05  |
| KEGG_PATHWAY | Platelet activation                          | 25    | 5.50E-06 | 6.40E-05  |
| KEGG_PATHWAY | Chemokine signaling pathway                  | 32    | 6.20E-06 | 6.90E-05  |
| KEGG_PATHWAY | Toll-like receptor signaling pathway         | 21    | 1.00E-05 | 1.10E-04  |
| KEGG_PATHWAY | Alcoholism                                   | 32    | 1.20E-05 | 1.20E-04  |
| KEGG_PATHWAY | Hepatitis B                                  | 26    | 1.20E-05 | 1.20E-04  |
| KEGG_PATHWAY | Intestinal immune network for IgA production | 13    | 1.30E-05 | 1.20E-04  |
| KEGG_PATHWAY | Antigen processing and presentation          | 18    | 2.50E-05 | 2.20E-04  |
| KEGG_PATHWAY | Influenza A                                  | 28    | 2.50E-05 | 2.20E-04  |
| KEGG_PATHWAY | Inflammatory bowel disease (IBD)             | 15    | 2.60E-05 | 2.20E-04  |
| KEGG_PATHWAY | Herpes simplex infection                     | 31    | 5.40E-05 | 4.40E-04  |
| KEGG_PATHWAY | Viral myocarditis                            | 17    | 5.80E-05 | 4.60E-04  |
| KEGG_PATHWAY | Pertussis                                    | 16    | 9.70E-05 | 7.40E-04  |
| KEGG_PATHWAY | Cytokine-cytokine receptor interaction       | 33    | 1.70E-04 | 1.20E-03  |

|              |                                           |    |          |          |
|--------------|-------------------------------------------|----|----------|----------|
| KEGG_PATHWAY | Toxoplasmosis                             | 19 | 2.00E-04 | 1.40E-03 |
| KEGG_PATHWAY | NF-kappa B signaling pathway              | 18 | 2.20E-04 | 1.60E-03 |
| KEGG_PATHWAY | Measles                                   | 22 | 2.70E-04 | 1.90E-03 |
| KEGG_PATHWAY | Primary immunodeficiency                  | 10 | 3.00E-04 | 2.00E-03 |
| KEGG_PATHWAY | Rheumatoid arthritis                      | 16 | 3.20E-04 | 2.10E-03 |
| KEGG_PATHWAY | T cell receptor signaling pathway         | 18 | 3.70E-04 | 2.30E-03 |
| KEGG_PATHWAY | DNA replication                           | 10 | 3.90E-04 | 2.40E-03 |
| KEGG_PATHWAY | PI3K-Akt signaling pathway                | 41 | 6.50E-04 | 3.90E-03 |
| KEGG_PATHWAY | Asthma                                    | 8  | 7.60E-04 | 4.40E-03 |
| KEGG_PATHWAY | Regulation of actin cytoskeleton          | 28 | 1.00E-03 | 5.90E-03 |
| KEGG_PATHWAY | Allograft rejection                       | 12 | 1.10E-03 | 6.00E-03 |
| KEGG_PATHWAY | MAPK signaling pathway                    | 31 | 1.40E-03 | 7.90E-03 |
| KEGG_PATHWAY | Hematopoietic cell lineage                | 15 | 1.50E-03 | 7.90E-03 |
| KEGG_PATHWAY | Jak-STAT signaling pathway                | 21 | 1.60E-03 | 8.50E-03 |
| KEGG_PATHWAY | Graft-versus-host disease                 | 11 | 2.10E-03 | 1.10E-02 |
| KEGG_PATHWAY | Malaria                                   | 10 | 4.20E-03 | 2.10E-02 |
| KEGG_PATHWAY | Legionellosis                             | 11 | 4.30E-03 | 2.10E-02 |
| KEGG_PATHWAY | Proteoglycans in cancer                   | 25 | 4.80E-03 | 2.30E-02 |
| KEGG_PATHWAY | Fc epsilon RI signaling pathway           | 12 | 5.30E-03 | 2.50E-02 |
| KEGG_PATHWAY | Protein digestion and absorption          | 14 | 5.70E-03 | 2.60E-02 |
| KEGG_PATHWAY | Autoimmune thyroid disease                | 12 | 7.40E-03 | 3.40E-02 |
| KEGG_PATHWAY | Type I diabetes mellitus                  | 11 | 7.90E-03 | 3.50E-02 |
| KEGG_PATHWAY | HIF-1 signaling pathway                   | 15 | 8.10E-03 | 3.60E-02 |
| KEGG_PATHWAY | Cytosolic DNA-sensing pathway             | 11 | 9.90E-03 | 4.20E-02 |
| KEGG_PATHWAY | Colorectal cancer                         | 11 | 9.90E-03 | 4.20E-02 |
| KEGG_PATHWAY | Small cell lung cancer                    | 13 | 1.00E-02 | 4.20E-02 |
| KEGG_PATHWAY | Acute myeloid leukemia                    | 10 | 1.20E-02 | 4.80E-02 |
| KEGG_PATHWAY | Salmonella infection                      | 12 | 1.50E-02 | 5.90E-02 |
| KEGG_PATHWAY | Pathways in cancer                        | 39 | 1.60E-02 | 6.10E-02 |
| KEGG_PATHWAY | Rap1 signaling pathway                    | 24 | 1.70E-02 | 6.70E-02 |
| KEGG_PATHWAY | Apoptosis                                 | 10 | 1.80E-02 | 6.90E-02 |
| KEGG_PATHWAY | MicroRNAs in cancer                       | 29 | 1.90E-02 | 7.10E-02 |
| KEGG_PATHWAY | Cell cycle                                | 16 | 1.90E-02 | 7.10E-02 |
| KEGG_PATHWAY | Hepatitis C                               | 17 | 2.00E-02 | 7.30E-02 |
| KEGG_PATHWAY | Chagas disease (American trypanosomiasis) | 14 | 2.00E-02 | 7.30E-02 |
| KEGG_PATHWAY | Gap junction                              | 12 | 2.90E-02 | 1.00E-01 |
| KEGG_PATHWAY | Glioma                                    | 10 | 2.90E-02 | 1.00E-01 |
| KEGG_PATHWAY | NOD-like receptor signaling pathway       | 9  | 3.60E-02 | 1.20E-01 |

|              |                                                 |    |          |          |
|--------------|-------------------------------------------------|----|----------|----------|
| KEGG_PATHWAY | Progesterone-mediated oocyte maturation         | 11 | 6.70E-02 | 2.30E-01 |
| KEGG_PATHWAY | Prion diseases                                  | 6  | 6.80E-02 | 2.30E-01 |
| KEGG_PATHWAY | Pancreatic cancer                               | 9  | 6.90E-02 | 2.30E-01 |
| KEGG_PATHWAY | Glycosphingolipid biosynthesis - ganglio series | 4  | 7.50E-02 | 2.50E-01 |
| KEGG_PATHWAY | Choline metabolism in cancer                    | 12 | 7.70E-02 | 2.50E-01 |
| KEGG_PATHWAY | Non-small cell lung cancer                      | 8  | 8.00E-02 | 2.60E-01 |
| KEGG_PATHWAY | Axon guidance                                   | 14 | 9.30E-02 | 2.90E-01 |
| KEGG_PATHWAY | mTOR signaling pathway                          | 8  | 1.00E-01 | 3.10E-01 |

---

**Supplementary Table S6. Urine albumin-to-creatinine ratio at one month of age.**

| Mouse                                                    | Urine albumin-to-creatinine ratio ( $\mu\text{g}/\text{mg}\cdot\text{Cr}$ ) |
|----------------------------------------------------------|-----------------------------------------------------------------------------|
| $\text{Crb2}^{\text{fl/fl}}$                             | 29                                                                          |
| $\text{Crb2}^{\text{fl/fl}}$                             | 59                                                                          |
| $\text{Crb2}^{\text{fl/+}}\text{pod-Cre}^{\text{Tg/+}}$  | 61                                                                          |
| $\text{Crb2}^{\text{fl/fl}}\text{pod-Cre}^{\text{Tg/+}}$ | 84291                                                                       |
